# Supplementary material for: Enhanced photocatalytic activity and chemical sensor development based on ternary B2O3·Zn6Al2O9·ZnO nanomaterials for environmental safety
Source: Royal Society of Chemistry journal article supplement (doi:10.1039/c7nj01281k), 2017-01-01
Supplement: c7nj01281k1.pdf [file c7nj01281k1.pdf]

## Enhanced Photocatalytic activity and Chemical sensor development based on ternary $B_2O_3 \cdot Zn_6Al_2O_9 \cdot ZnO$ nanomaterials for environmental safety

Md Abdus Subhan<sup>a,\*</sup>, Pallab Chandra Saha<sup>a</sup>, Mohammed M. Rahman<sup>b,\*</sup>, Mohammad Arifur

Rahman Akand<sup>a</sup>, Abdullah M. Asiri<sup>b</sup> and Mohammad Al-Mamun<sup>c</sup>

<sup>a</sup>*Department of Chemistry, Shahjalal University of Science and Technology, Sylhet, Bangladesh*

<sup>b</sup>*Center of Excellence for Advanced Materials Research (CEAMR) & Department of Chemistry, Faculty of Science, King Abdulaziz University, P.O. Box 80203, Jeddah 21589, Saudi Arabia,*

<sup>c</sup>*Centre for Clean Environment and Energy, Griffith School of Environment, Gold Coast Campus, Griffith University, QLD 4222, Australia.*

### Supplementary Materials

#### Figures

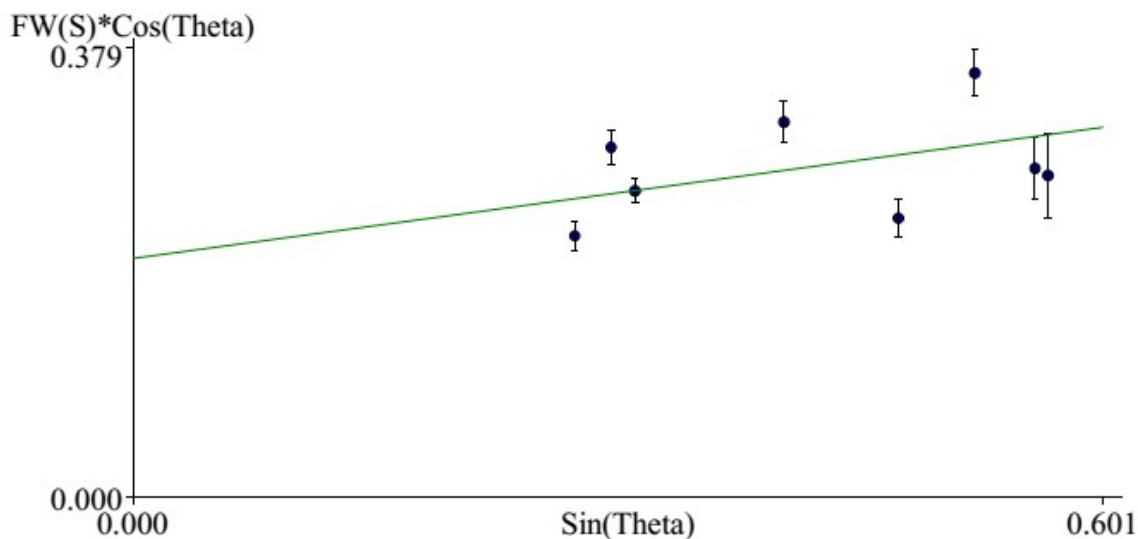

Fig. S1:  $\beta_1 \cos\theta$  vs.  $\sin\theta$  plot from XRD patten

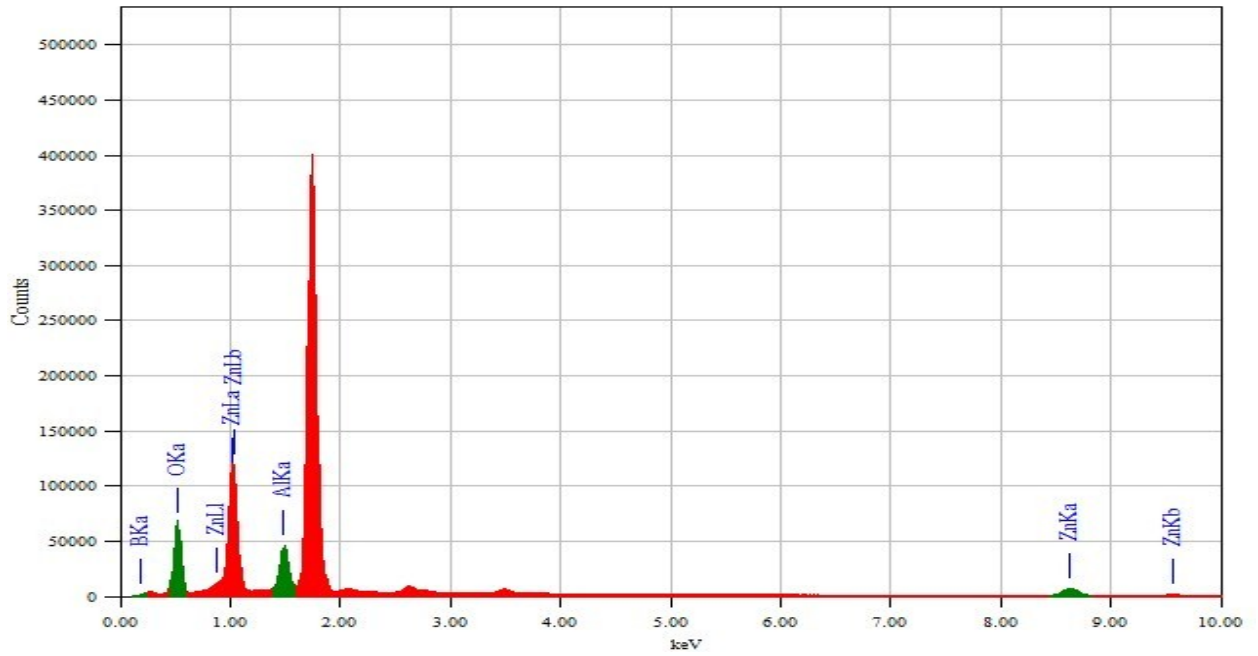

Fig S2. EDS of ternary  $B_2O_3 \cdot Zn_6Al_2O_9 \cdot ZnO$  nanomaterials

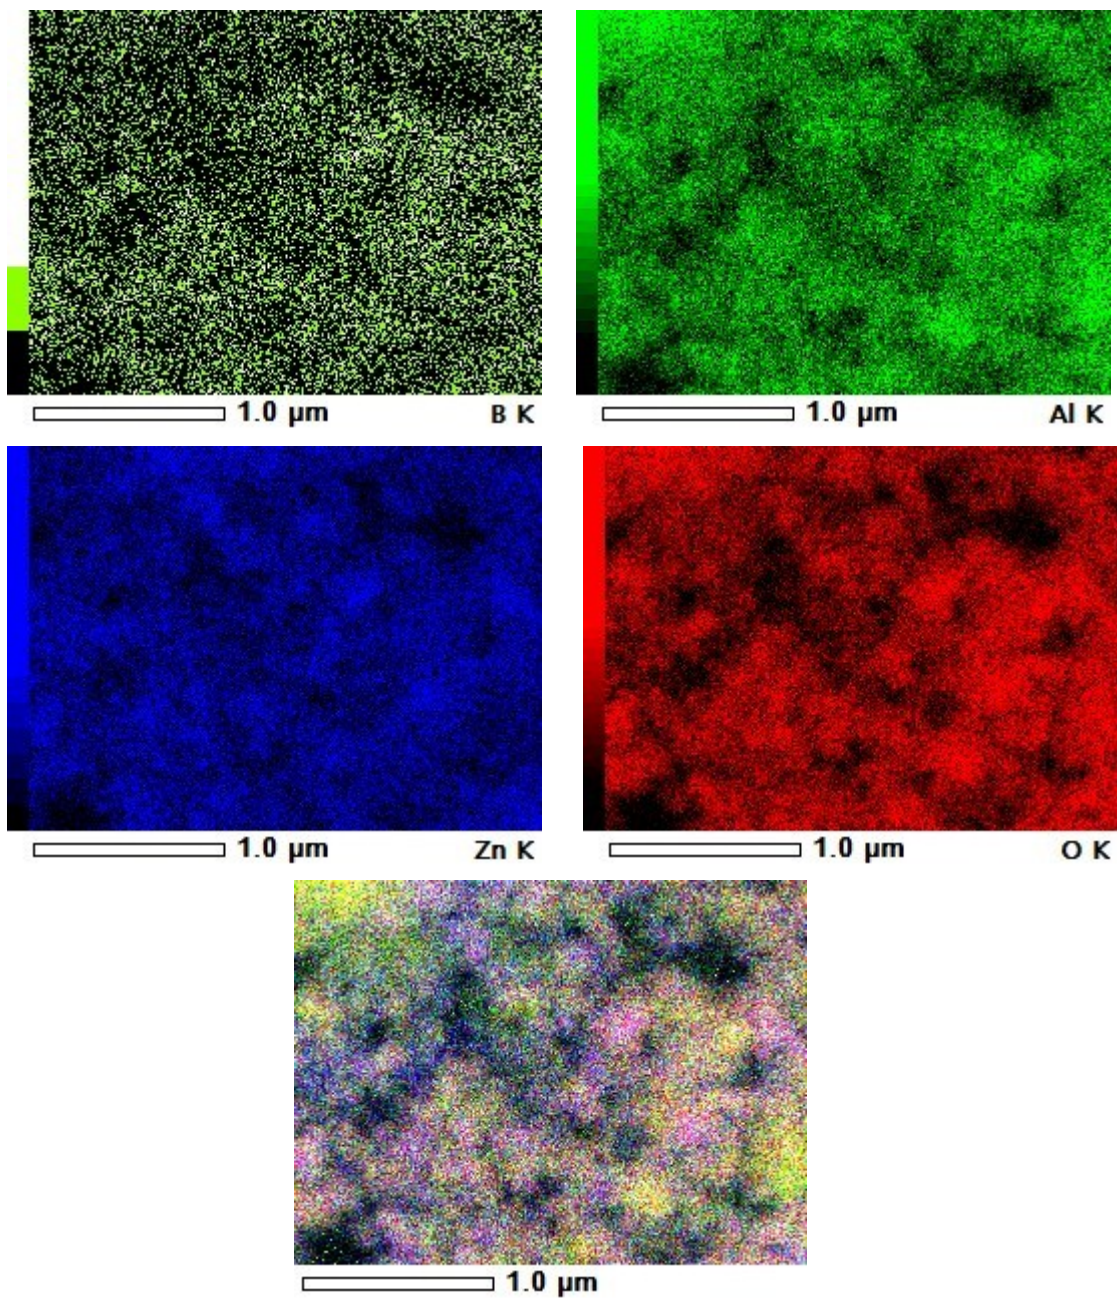

Fig. S3: SEM-EDS mapping of (a) Boron, (b) Aluminum, (c) Zinc, (d) Oxygen, and (e) is the Overlap of all of them

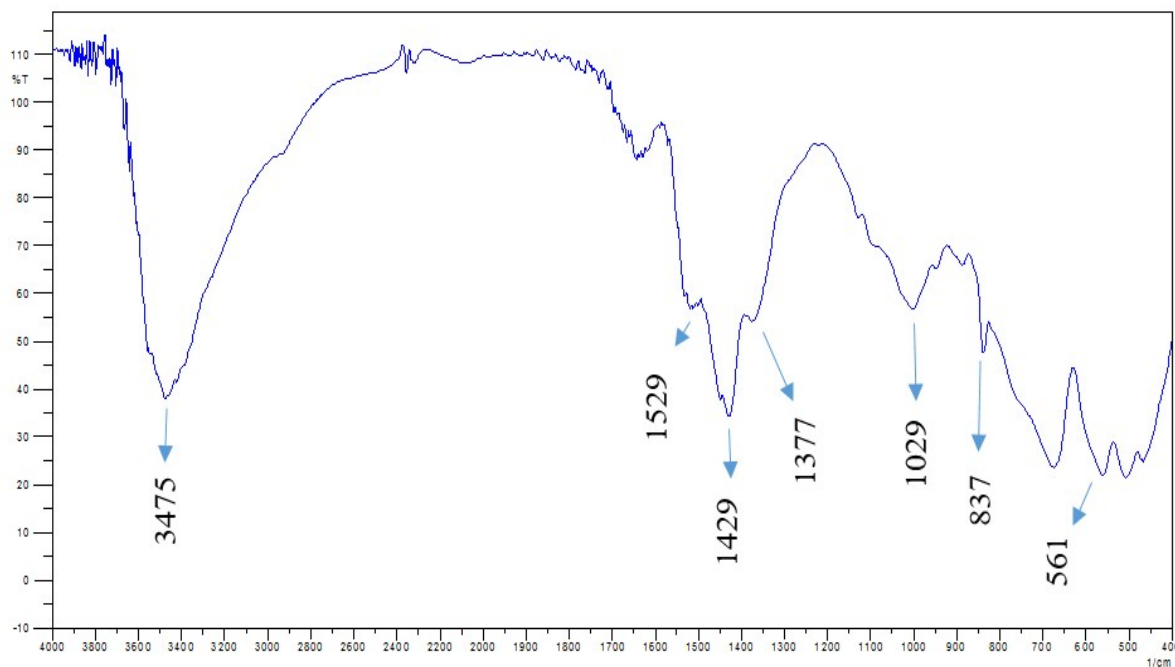

Fig. S4: FTIR spectra of synthesized nanomaterial

Tables:

Table S1: EDS data representation with the atomic and mass percent elements

| Element | (keV) | Mass% | Sigma | Atom% |
|---------|-------|-------|-------|-------|
| B K     | 0.183 | 1.56  | 0.03  | 3.95  |
| O K     | 0.525 | 34.49 | 0.07  | 58.92 |
| Al K    | 1.486 | 17.48 | 0.05  | 17.71 |
| Zn K    | 8.63  | 46.46 | 0.24  | 19.42 |
| Total   |       | 100   |       | 100   |

Table S2: PL and PLE peaks observed with temperature variance

| Calcination Temperature | Method     | Observed at Wavelength/nm | Peaks Observed at Wavelength/nm       |
|-------------------------|------------|---------------------------|---------------------------------------|
| 900 °C                  | Excitation | 250                       | 369, 404, 412, 425, 450, 467, and 482 |

|        |            |     |                                       |
|--------|------------|-----|---------------------------------------|
|        |            | 300 | 381, 404, 428, and 451                |
| 600 °C | Excitation | 250 | 386, 404, 422, 450, 467, 482, and 492 |
|        |            | 300 | 404, 412, 421, 450, 467, and 482      |
| 450 °C | Excitation | 250 | 340, 404, 426, and 450                |
|        |            | 300 | 404, 426, and 450                     |
|        | Monitor    | 600 | 350, 370, and 390                     |
